# Supplementary material for: Brain insulin sensitivity is linked to adiposity and body fat distribution
Source: PubMed Central journal article supplement (PMC7160151; doi:10.1038/s41467-020-15686-y), 2020-04-15
Supplement: 41467_2020_15686_MOESM1_ESM.pdf [file 41467_2020_15686_MOESM1_ESM.pdf]

**Supplementary material for**

**Brain insulin sensitivity is linked to adiposity and body fat distribution**

Stephanie Kullmann, Vera Valenta, Robert Wagner, Otto Tschritter, Jürgen Machann,  
Hans-Ulrich Häring, Hubert Preissl, Andreas Fritsche, and Martin Heni

## Supplementary Tables

Supplementary Table 1: Participants' characteristics of the longitudinal TULIP study

| Characteristic                         | Baseline   | at 24 months | at long-term follow-up |
|----------------------------------------|------------|--------------|------------------------|
| <b>N</b>                               | 15         |              |                        |
| <b>Sex (f/m)</b>                       | 7/8        |              |                        |
| <b>Age (y)</b>                         | 45 ± 2     | 46 ± 2       | 54 ± 2                 |
| <b>BMI (kg/m<sup>2</sup>)</b>          | 30.2 ± 0.8 | 29.7 ± 0.9   | 30.2 ± 0.8             |
| <b>Total adipose tissue (l)</b>        | 33.2 ± 2.8 | 29.7 ± 2.8   | 34.7 ± 2.9             |
| <b>Visceral adipose tissue (l)</b>     | 4.1 ± 0.5  | 3.5 ± 0.5    | 5.2 ± 0.8              |
| <b>Subcutaneous adipose tissue (l)</b> | 12.2 ± 0.9 | 10.6 ± 1.1   | 12.3 ± 1.0             |

Presented are means ± SEM.

Supplementary Table 2: Participants' characteristics of the cross-sectional cohort

| Characteristic                         |            |
|----------------------------------------|------------|
| <b>N</b>                               | 112        |
| <b>Sex (f/m)</b>                       | 53/59      |
| <b>Age (y)</b>                         | 39 ± 2     |
| <b>BMI (kg/m<sup>2</sup>)</b>          | 28.4 ± 0.5 |
| <b>Total adipose tissue (l)</b>        | 31.9 ± 1.3 |
| <b>Visceral adipose tissue (l)</b>     | 3.4 ± 0.2  |
| <b>Subcutaneous adipose tissue (l)</b> | 12.6 ± 0.5 |

Presented are means ± SEM.

Supplementary Table 3: Changes in body composition and metabolism during and after 9 years of lifestyle intervention

|                                                  | brain insulin resistant (N=8) |      | brain insulin sensitive (N=7) |      | pManova (brain insulin sensitivity x time) |
|--------------------------------------------------|-------------------------------|------|-------------------------------|------|--------------------------------------------|
|                                                  | mean                          | SEM  | mean                          | SEM  |                                            |
| <b>Change in body weight (kg)</b>                |                               |      |                               |      | 0.05                                       |
| after 9 months                                   | -0.94                         | 1.37 | -4.46                         | 1.42 |                                            |
| after 24 months                                  | 1.44                          | 1.32 | -5.80                         | 2.80 |                                            |
| after 9 years                                    | 1.63                          | 1.39 | -5.06                         | 3.59 |                                            |
| <b>Change in BMI (kg/m<sup>2</sup>)</b>          |                               |      |                               |      | 0.08                                       |
| after 9 months                                   | -0.37                         | 0.49 | -1.49                         | 0.45 |                                            |
| after 24 months                                  | 0.55                          | 0.47 | -1.66                         | 0.91 |                                            |
| after 9 years                                    | 0.94                          | 0.44 | -1.22                         | 1.04 |                                            |
| <b>Change in WHR</b>                             |                               |      |                               |      | 0.0478                                     |
| after 9 months                                   | 0.00                          | 0.02 | -0.04                         | 0.01 |                                            |
| after 24 months                                  | -0.02                         | 0.02 | -0.05                         | 0.01 |                                            |
| after 9 years                                    | 0.02                          | 0.02 | -0.02                         | 0.03 |                                            |
| <b>Change in total adipose tissue (l)</b>        |                               |      |                               |      | 0.0128                                     |
| after 9 months                                   | -0.98                         | 1.35 | -5.90                         | 2.04 |                                            |
| after 24 months                                  | 0.85                          | 1.26 | -7.99                         | 2.28 |                                            |
| after 9 years                                    | 5.24                          | 1.30 | -2.72                         | 4.38 |                                            |
| <b>Change in visceral adipose tissue (l)</b>     |                               |      |                               |      | 0.0092                                     |
| after 9 months                                   | -0.24                         | 0.17 | -0.86                         | 0.30 |                                            |
| after 24 months                                  | -0.03                         | 0.26 | -1.08                         | 0.30 |                                            |
| after 9 years                                    | 1.18                          | 0.35 | 0.29                          | 0.65 |                                            |
| <b>Change in subcutaneous adipose tissue (l)</b> |                               |      |                               |      | 0.07                                       |
| after 9 months                                   | -0,15                         | 0,65 | -1,97                         | 0,74 |                                            |
| after 24 months                                  | 0,03                          | 0,43 | -3,39                         | 0,79 |                                            |
| after 9 years                                    | 1,69                          | 0,25 | -0,65                         | 1,22 |                                            |

The group was stratified by the median brain response to insulin infusion, corrected for response to saline infusion, assessed by MEG as change in theta frequency band. P values are from MANOVAs with theta band response as a continuous variable.
